# Supplementary material for: A Minor Dihydropyran Apocarotenoid from Mated Cultures of Blakeslea trispora
Source: MDPI journal article supplement (doi:10.3390/molecules171112553), 2012-10-24

# Supporting Information

Figure S1. Spectrum  $^1\text{H-NMR}$  of 2.

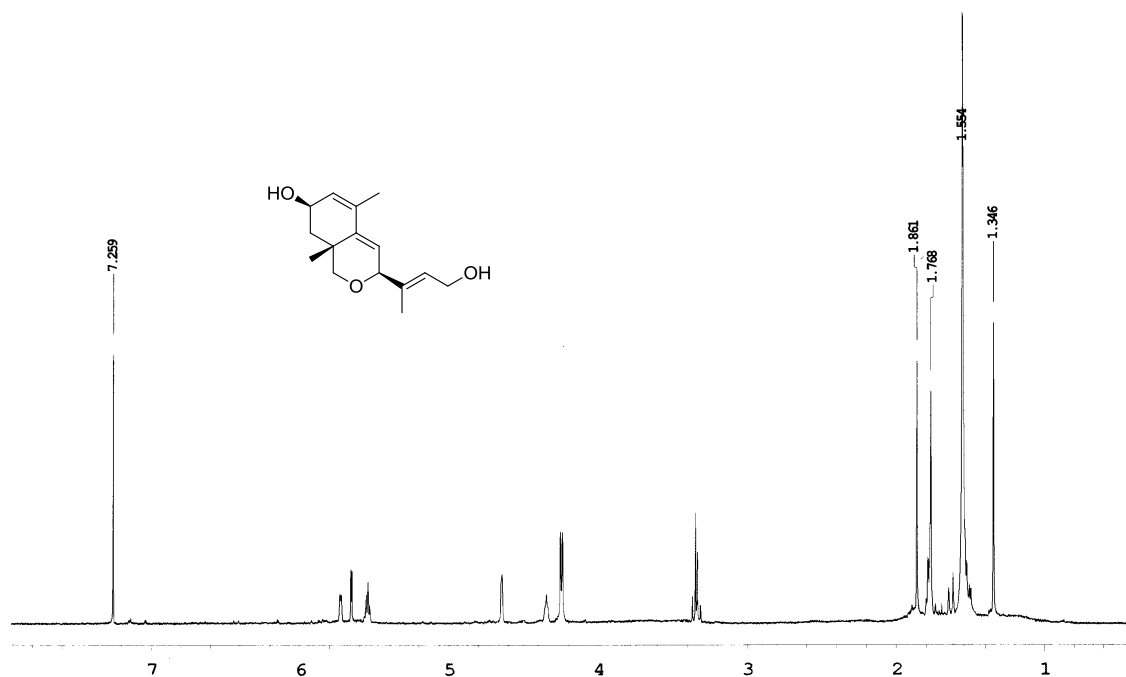

Figure S2. Spectrum  $^{13}\text{C-NMR}$  of 2.

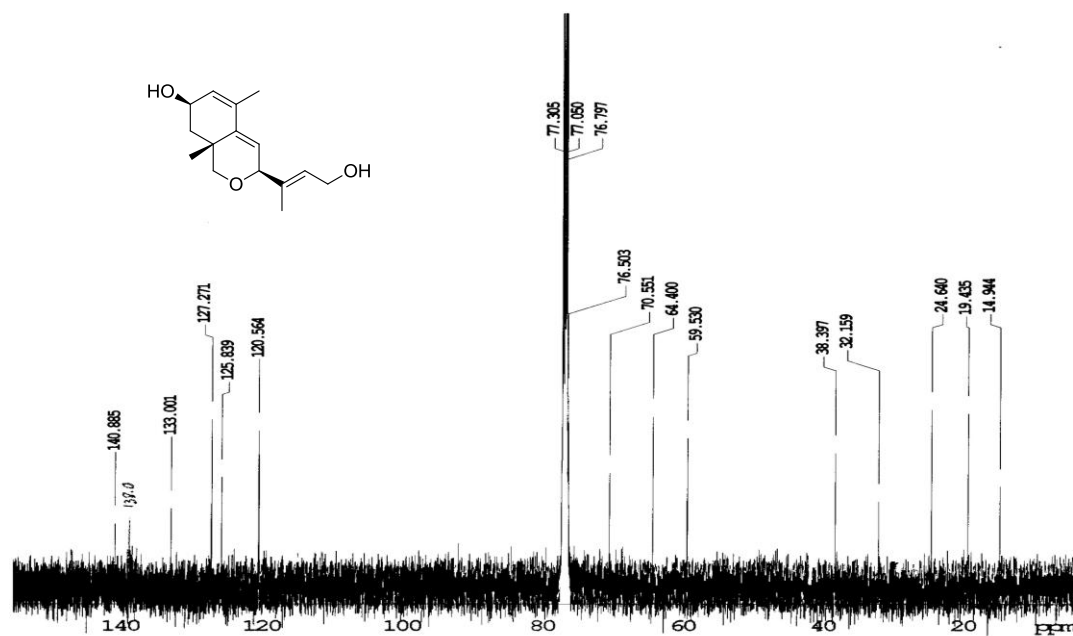

Supplement: s1 [file s1]
